# Supplementary material for: The Stress-Strain Data of the Hip Capsule Ligaments Are Gender and Side Independent Suggesting a Smaller Contribution to Passive Stiffness
Source: PubMed Central journal article supplement (PMC5042535; doi:10.1371/journal.pone.0163306), 2016-09-29
Supplement: pone.0163306.s003.pdf [file pone.0163306.s003.pdf]

| Tissue Number | Age [years]   | Gender    | Side       | Cause of Death       | Iliofemoral (n=17) |               |                |                             |             |             | Ischiofemoral (n=9) |               |                |                             |             |             | Pubofemoral (n=17) |                |                |                             |             |             |
|---------------|---------------|-----------|------------|----------------------|--------------------|---------------|----------------|-----------------------------|-------------|-------------|---------------------|---------------|----------------|-----------------------------|-------------|-------------|--------------------|----------------|----------------|-----------------------------|-------------|-------------|
|               |               |           |            |                      | Strain [%]         |               |                | Stress [N/mm <sup>2</sup> ] |             |             | Strain [%]          |               |                | Stress [N/mm <sup>2</sup> ] |             |             | Strain [%]         |                |                | Stress [N/mm <sup>2</sup> ] |             |             |
|               |               |           |            |                      | Mean               | Minimum       | Maximum        | Mean                        | Minimum     | Maximum     | Mean                | Minimum       | Maximum        | Mean                        | Minimum     | Maximum     | Mean               | Minimum        | Maximum        | Mean                        | Minimum     | Maximum     |
|               |               |           |            |                      | 129.79 ± 11.08     | 120.44 ± 8.04 | 132.15 ± 12.36 | 4.46 ± 1.93                 | 3.01 ± 1.57 | 4.88 ± 2.15 | 128.67 ± 13.68      | 120.43 ± 9.46 | 130.18 ± 14.73 | 2.83 ± 1.89                 | 2.14 ± 1.39 | 3.28 ± 2.02 | 133.24 ± 23.74     | 124.56 ± 20.36 | 135.34 ± 25.03 | 4.53 ± 2.79                 | 3.08 ± 1.63 | 5.18 ± 3.78 |
| Σ=17          | 83.65 ± 10.54 | F:M (9:7) | L:R (13:8) |                      |                    |               |                |                             |             |             |                     |               |                |                             |             |             |                    |                |                |                             |             |             |
| 1             | 95            | F         | L          | Heart failure        | 131.34             | 122.26        | 133.07         | 4.77                        | 3.25        | 5.04        |                     |               |                |                             |             | 117.64      | 110.33             | 119.21         | 11.58          | 3.42                        | 16.44       |             |
| 2             | 78            | M         | L          | Acute myocardinfarct | 153.42             | 122.47        | 161.26         | 1.16                        | 0.72        | 1.34        |                     |               |                |                             |             | 138.53      | 126.71             | 142.47         | 8.68           | 5.28                        | 9.58        |             |
| 3             | 97            | F         | L          | Acute myocardinfarct | 129.83             | 124.22        | 130.84         | 3.19                        | 2.69        | 3.30        |                     |               |                |                             |             | 115.00      | 111.57             | 115.98         | 2.92           | 2.58                        | 3.00        |             |
| 4             | 85            | F         | R          | Pneumonia            | 124.02             | 120.70        | 124.85         | 6.35                        | 5.80        | 6.50        | 129.85              | 120.09        | 131.80         | 0.39                        | 0.30        | 0.46        | 122.91             | 108.60         | 125.73         | 2.61                        | 1.24        | 2.82        |
| 5             | 79            | F         | L          | Pulmonary embolism   | 141.85             | 136.45        | 143.04         | 7.07                        | 5.67        | 7.37        |                     |               |                |                             |             | 138.08      | 129.39             | 139.51         | 4.38           | 3.69                        | 4.56        |             |
| 5             | 79            | F         | R          | Pulmonary embolism   | 126.91             | 121.53        | 128.15         | 5.49                        | 3.46        | 6.01        |                     |               |                |                             |             | 202.66      | 187.87             | 207.38         | 5.39           | 4.60                        | 5.66        |             |
| 6             | 89            | F         | L          | Pneumonia            | 132.61             | 126.89        | 134.24         | 5.49                        | 4.60        | 5.73        | 154.92              | 126.71        | 159.84         | 6.06                        | 3.82        | 6.55        | 116.69             | 110.04         | 117.53         | 1.01                        | 0.60        | 1.07        |
| 7             | 68            | M         | L          | Pulmonary embolism   | 113.77             | 106.90        | 115.75         | 2.44                        | 0.44        | 3.04        | 145.27              | 141.99        | 146.04         | 3.86                        | 3.65        | 3.92        | 132.72             | 127.93         | 134.66         | 2.26                        | 2.05        | 2.42        |
| 7             | 68            | M         | R          | Pulmonary embolism   | 127.11             | 123.74        | 128.35         | 4.77                        | 3.90        | 4.97        |                     |               |                |                             |             |             |                    |                |                |                             |             |             |
| 8             | 104           | F         | L          | Heart failure        | 124.16             | 119.66        | 126.01         | 2.90                        | 2.81        | 3.00        |                     |               |                |                             |             |             |                    |                |                |                             |             |             |
| 9             | 67            | F         | L          | Acute pancreatitis   | 125.23             | 114.66        | 127.53         | 2.00                        | 1.23        | 2.13        | 115.37              | 113.93        | 115.78         | 0.73                        | 0.72        | 0.74        |                    |                |                |                             |             |             |
| 10            | 74            | M         | L          | Heart-lung failure   | 144.85             | 135.09        | 148.15         | 3.03                        | 2.33        | 3.32        | 119.21              | 111.17        | 120.14         | 3.22                        | 2.10        | 3.36        | 123.82             | 121.34         | 124.38         | 4.30                        | 3.60        | 4.53        |
| 10            | 74            | M         | R          | Heart-lung failure   |                    |               |                |                             |             |             | 117.12              | 114.59        | 117.79         | 1.44                        | 1.42        | 1.46        | 119.61             | 109.08         | 121.42         | 4.86                        | 1.48        | 7.66        |
| 11            | 87            | M         | R          | Heart failure        | 147.14             | 120.00        | 152.90         | 5.85                        | 2.77        | 6.39        | 131.95              | 119.50        | 133.70         | 1.80                        | 1.24        | 3.66        | 123.79             | 117.16         | 125.44         | 3.47                        | 3.05        | 3.60        |
| 12            | 79            | F         | L          | Cardiac arrest       | 118.68             | 116.20        | 119.30         | 2.60                        | 2.54        | 2.70        |                     |               |                |                             |             |             | 117.00             | 113.55         | 117.59         | 3.60                        | 3.01        | 3.69        |
| 12            | 79            | F         | R          | Cardiac arrest       |                    |               |                |                             |             |             |                     |               |                |                             |             |             | 122.19             | 121.47         | 122.55         | 4.48                        | 4.43        | 4.60        |
| 13            | 89            | M         | R          | Cardiac arrest       | 126.27             | 111.09        | 128.43         | 4.44                        | 1.45        | 5.48        |                     |               |                |                             |             |             | 181.63             | 158.89         | 187.67         | 8.40                        | 6.50        | 8.88        |
| 14            | 84            | M         | L          | Pneumonia            | 116.42             | 107.86        | 120.74         | 6.90                        | 2.87        | 8.53        |                     |               |                |                             |             |             | 123.94             | 113.69         | 126.23         | 4.09                        | 2.62        | 4.34        |
| 14            | 84            | M         | R          | Pneumonia            | 122.83             | 117.75        | 124.06         | 7.41                        | 4.59        | 8.10        |                     |               |                |                             |             |             |                    |                |                |                             |             |             |
| 16            | 71            | M         | L          | unknown              |                    |               |                |                             |             |             | 117.93              | 113.64        | 119.31         | 3.41                        | 2.01        | 4.60        | 136.94             | 127.66         | 138.18         | 0.59                        | 0.46        | 0.61        |
| 17            | 81            | F         | L          | Heart failure        |                    |               |                |                             |             |             | 126.38              | 122.22        | 127.18         | 4.60                        | 4.04        | 4.73        | 131.92             | 122.23         | 134.78         | 4.36                        | 3.70        | 4.56        |
