# Supplementary material for: The Stress-Strain Data of the Hip Capsule Ligaments Are Gender and Side Independent Suggesting a Smaller Contribution to Passive Stiffness
Source: PubMed Central journal article supplement (PMC5042535; doi:10.1371/journal.pone.0163306), 2016-09-29
Supplement: pone.0163306.s004.pdf [file pone.0163306.s004.pdf]

| Tissue Number | Age [years]   | Gender    | Side        | Cause of Death       | Iliofemoral (n=17)               |                                      | Ischiofemoral (n=9)              |                                      | Pubofemoral (n=17)               |                                      |
|---------------|---------------|-----------|-------------|----------------------|----------------------------------|--------------------------------------|----------------------------------|--------------------------------------|----------------------------------|--------------------------------------|
| $\Sigma=17$   | 83,65 ± 10,54 | F:M (9:7) | L :R (13:8) |                      | Cross-section [mm <sup>2</sup> ] | Elastic Modulus [N/mm <sup>2</sup> ] | Cross-section [mm <sup>2</sup> ] | Elastic Modulus [N/mm <sup>2</sup> ] | Cross-section [mm <sup>2</sup> ] | Elastic Modulus [N/mm <sup>2</sup> ] |
|               |               |           |             |                      | 53.47 ± 15.12                    | 48.79 ± 21.43                        | 19.23 ± 13.23                    | 37.46 ± 20.42                        | 15.20 ± 7.19                     | 49.03 ± 32.07                        |
| 1             | 95            | F         | L           | Heart failure        | 49.85                            | 49.28                                |                                  |                                      | 11.62                            | 148.15                               |
| 2             | 78            | M         | L           | Acute myocardinfarct | 73.76                            | 11.08                                |                                  |                                      | 13.75                            | 73.99                                |
| 3             | 97            | F         | L           | Acute myocardinfarct | 68.02                            | 31.53                                |                                  |                                      | 12.95                            | 46.07                                |
| 4             | 85            | F         | R           | Pneumonia            | 34.94                            | 69.22                                | 19.25                            | 5.36                                 | 30.70                            | 11.03                                |
| 5             | 79            | F         | L           | Pulmonary embolism   | 36.81                            | 50.81                                |                                  |                                      | 4.80                             | 55.08                                |
| 5             | 79            | F         | R           | Pulmonary embolism   | 61.35                            | 61.70                                |                                  |                                      | 11.92                            | 25.71                                |
| 6             | 89            | F         | L           | Pneumonia            | 41.67                            | 37.48                                | 12.27                            | 45.98                                | 17.43                            | 26.08                                |
| 7             | 68            | M         | L           | Pulmonary embolism   | 70.21                            | 58.06                                | 13.55                            | 41.14                                | 14.56                            | 28.26                                |
| 7             | 68            | M         | R           | Pulmonary embolism   | 51.40                            | 69.40                                |                                  |                                      |                                  |                                      |
| 8             | 104           | F         | L           | Heart failure        | 58.44                            | 43.80                                |                                  |                                      |                                  |                                      |
| 9             | 67            | F         | L           | Acute pancreatitis   | 74.38                            | 22.99                                | 18.72                            | 22.09                                |                                  |                                      |
| 10            | 74            | M         | L           | Heart-lung failure   | 60.14                            | 25.73                                | 15.51                            | 47.24                                | 19.41                            | 75.62                                |
| 10            | 74            | M         | R           | Heart-lung failure   |                                  |                                      | 53.01                            | 24.37                                | 10.01                            | 67.55                                |
| 11            | 87            | M         | R           | Heart failure        | 27.76                            | 40.29                                | 7.32                             | 24.90                                | 6.71                             | 40.6                                 |
| 12            | 79            | F         | L           | Cardiac arrest       | 43.13                            | 35.32                                |                                  |                                      | 13.36                            | 49.45                                |
| 12            | 79            | F         | R           | Cardiac arrest       |                                  |                                      |                                  |                                      | 29.44                            | 41.89                                |
| 13            | 89            | M         | R           | Cardiac arrest       | 40.37                            | 51.49                                |                                  |                                      | 8.40                             | 52.53                                |
| 14            | 84            | M         | L           | Pneumonia            | 72.94                            | 75.63                                |                                  |                                      | 16.11                            | 45.12                                |
| 14            | 84            | M         | R           | Pneumonia            | 43.94                            | 95.67                                |                                  |                                      |                                  |                                      |
| 16            | 71            | M         | L           | unknown              |                                  |                                      | 14.59                            | 74.22                                | 23.52                            | 7.62                                 |
| 17            | 81            | F         | L           | Heart failure        |                                  |                                      | 18.85                            | 51.84                                | 13.71                            | 38.73                                |
